# Supplementary material
Source: publisher figshare collection journal article supplement (https://acs.figshare.com/ndownloader/files/7284116)
Supplement: Supplementary file 1 [file 7284116]

# Supporting Information

## Electrochemical Cross-Talk Leading to Gas Evolution and Capacity

### Fade in $\text{LiNi}_{0.5}\text{Mn}_{1.5}\text{O}_4$ /Graphite Full-Cells

Barbara Michalak,<sup>†</sup> Balázs B. Berkes,<sup>\*,†</sup> Heino Sommer,<sup>†,‡</sup> Torsten Brezesinski,<sup>\*,†</sup> and Jürgen Janek<sup>†,+</sup>

<sup>†</sup>Battery and Electrochemistry Laboratory, Institute of Nanotechnology, Karlsruhe Institute of Technology, Hermann-von-Helmholtz-Platz 1, 76344 Eggenstein-Leopoldshafen, Germany.

<sup>‡</sup>BASF SE, 67056 Ludwigshafen, Germany.

<sup>+</sup>Institute of Physical Chemistry, Justus-Liebig-University Giessen, Heinrich-Buff-Ring 17, 35392 Giessen, Germany.

\*E-mail: torsten.brezesinski@kit.edu

\*E-mail: balazs.berkes@kit.edu

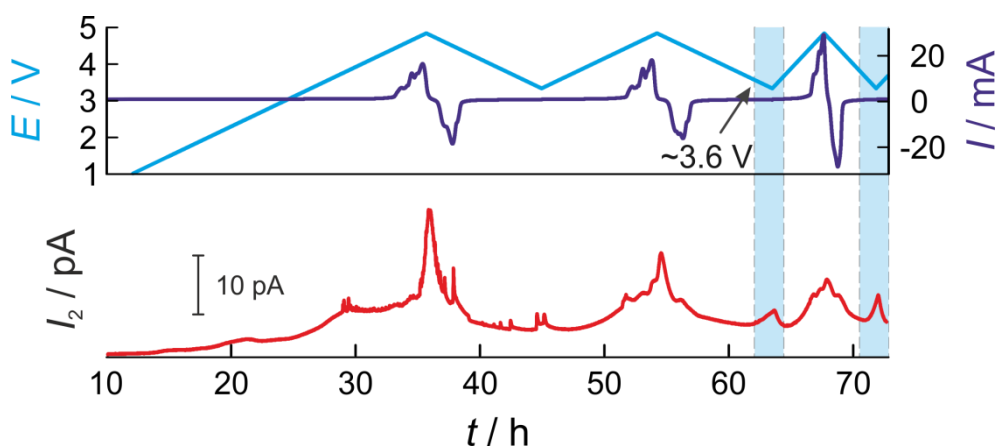

**Figure S1.** Cyclic voltammetric curves and the corresponding  $\text{H}_2$  signal ( $m/z = 2$ ) from DEMS for a standard LNMO/graphite cell. The sweep rate was 0.045 mV/s in the first two cycles, and then it was increased to 0.1 mV/s. As evident, the hydrogen peak at the end of discharge starts to appear at around 3.6 V.

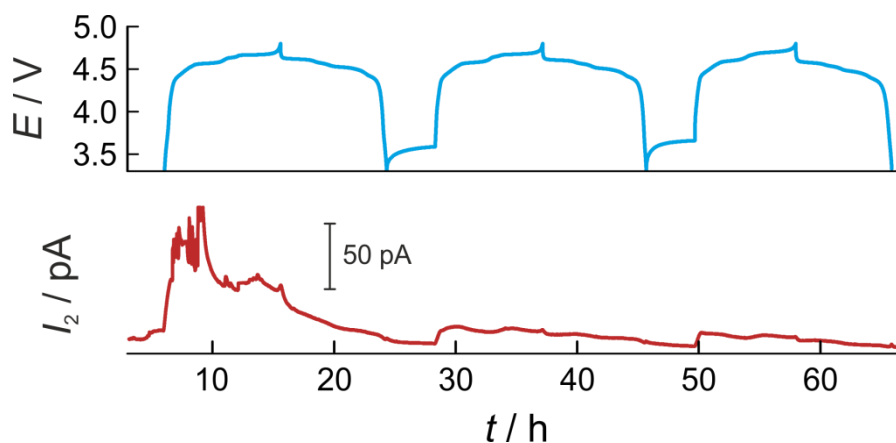

**Figure S2.** Voltage profiles and the corresponding  $\text{H}_2$  signal ( $m/z = 2$ ) from DEMS for a standard LNMO/precycled graphite cell at C/10.

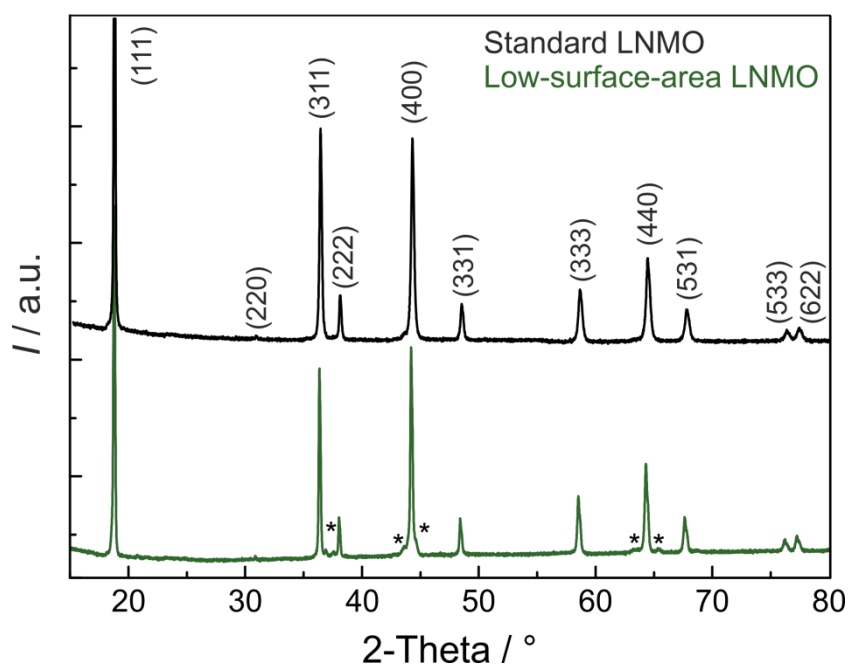

**Figure S3.** XRD patterns of standard LNMO and low-surface-area LNMO. Impurity phases (mainly NiO,  $\text{Li}_x\text{NiO}_2$ , and  $\text{Li}_2\text{MnO}_3$ ) in the latter material are indicated by asterisks.

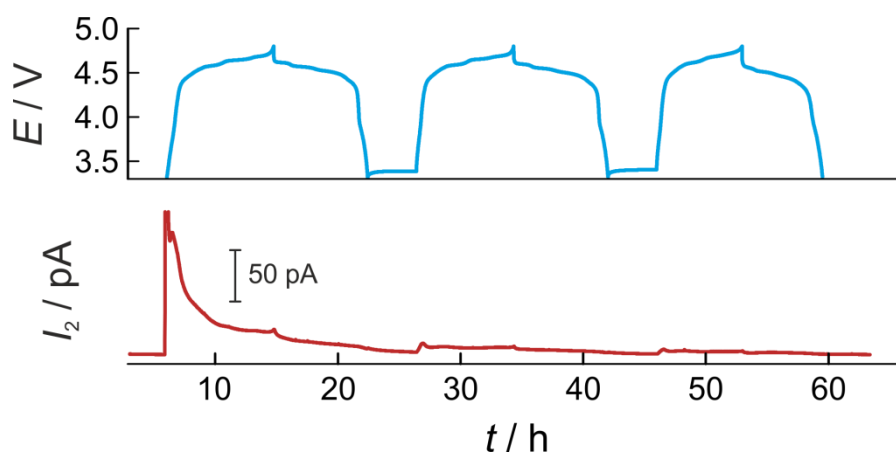

**Figure S4.** Voltage profiles and the corresponding  $\text{H}_2$  signal ( $m/z = 2$ ) from DEMS for a low-surface-area LNMO/graphite cell at C/10.
